# Supplementary material
Source: PubMed Central journal article supplement (PMC3773838)
Supplement: mmc1.pdf [file mmc1.pdf]

## SUPPLEMENTAL FIGURES LEGENDS

**Supplemental Fig. S1:** (A) Body weight and body composition were assessed in *WT* and *Per2<sup>Brdm1</sup>* mice kept on a standard chow diet. (B) Glucose tolerance test (GTT) of *WT* and *Per2<sup>Brdm1</sup>* mice kept on a standard chow diet and fasted 7 hours before the experiment. (C) Insulin tolerance test (ITT) of *WT* and *Per2<sup>Brdm1</sup>* mice kept on a standard chow diet and fasted 7 hours before the experiment. (D) Circadian fed glycemia of *WT* mice and *Per2<sup>Brdm1</sup>* mice. (E) Glycogen was measured in gastrocnemius muscles collected from *WT* mice and *Per2<sup>Brdm1</sup>* mice at the indicated ZT. Data are expressed as means, standard errors are indicated.

**Supplemental Fig. S2:** Circadian expression of clock genes in kidneys from *WT* mice and *Per2<sup>Brdm1</sup>* mice. (A) Real-time qPCR analysis of circadian expression of clock genes in kidneys collected from *WT* mice and *Per2<sup>Brdm1</sup>* mice at the indicated ZT points. (B) Real-time qPCR analysis of circadian expression of key glucose output genes from the kidneys above. Data are expressed as means, standard errors are indicated.

**Supplemental Fig. S3:** *Per2<sup>Brdm1</sup>* mice display altered circadian expression of functional genes in kidney, but display overall normal kidney function. (A) Real-time qPCR analysis of circadian expression of different functional genes, including water and sodium transporters, in kidneys collected from *WT* mice and *Per2<sup>Brdm1</sup>* mice at the indicated Zeitgeber time points. (B) Circulating vasopressin levels were measured in serum collected from *WT* mice and *Per2<sup>Brdm1</sup>* mice at the indicated ZT points. *WT* mice and

*Per2<sup>Brdm1</sup>* mice were placed in metabolic cages without water for 24 hours and urine excretion (C), urine osmolarity (D), and sodium excretion (E) were measured. Data are expressed as means, standard errors are indicated.

**Supplemental Fig. S4:** Serum insulin levels (A) and serum glucagon levels (B) were measured in *WT* mice and *Per2<sup>Brdm1</sup>* mice during fasting and refeeding, as described in figure 4, at the indicated time points. (C) Serum insulin / serum glucagon ratio was calculated. (D) Body weight of *WT* and *Per2<sup>Brdm1</sup>* mice during the fasting and refeeding, experiment described in figure 4. (E) Weight gain of *WT* and *Per2<sup>Brdm1</sup>* mice during the refeeding period TP1-TP2. (F) Weight loss of *WT* and *Per2<sup>Brdm1</sup>* mice during the fasting period TP2-TP3. (G) Circadian expression of PER2 in livers of *ad libitum* fed *WT* mice. Data are expressed as means, standard errors are indicated.

**Supplemental Fig. S5:** qPCR-ChIP controls. (A) PER2 binding to *Bmal-1* and *Rev-erba* genes was performed using livers from *WT* mice, as positive control, and of *Per2<sup>Brdm1</sup>* mice as negative control. PER2 binding to *Bmal-1* binding site-1 is mediated via REV-ERB $\alpha$ , to *Bmal-1* binding site-2 via PPAR $\alpha$ , and to *Rev-erba* binding site via BMAL-1/CLOCK complex [24]. (B) BMAL-1 binding to the PER2 binding site at the *Bmal-1* genomic region (negative control) and *Rev-erba* (positive control) was measured. Data are expressed as means, standard errors are indicated.

Supplemental Fig. S1

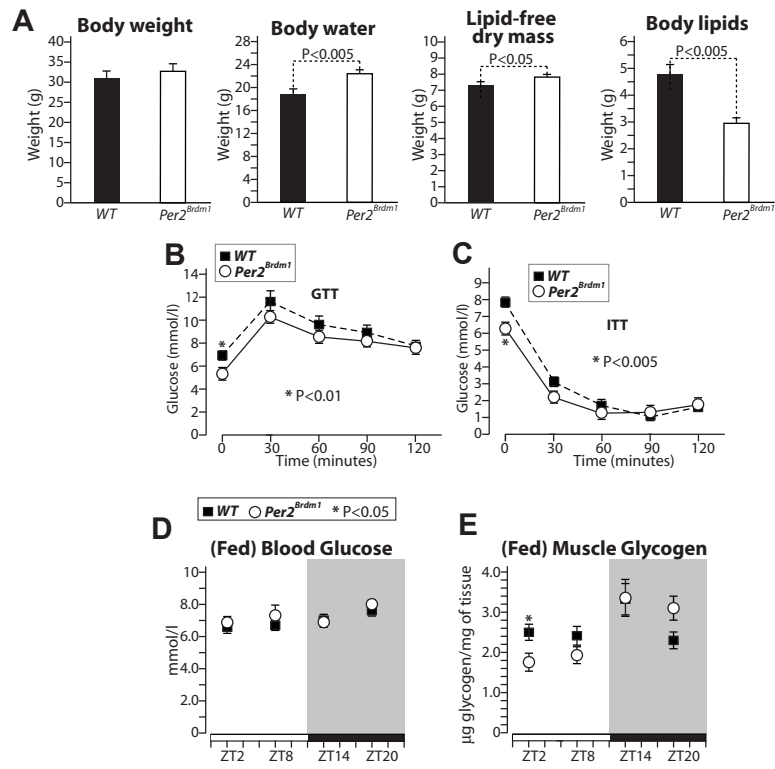

Supplemental Fig. S2

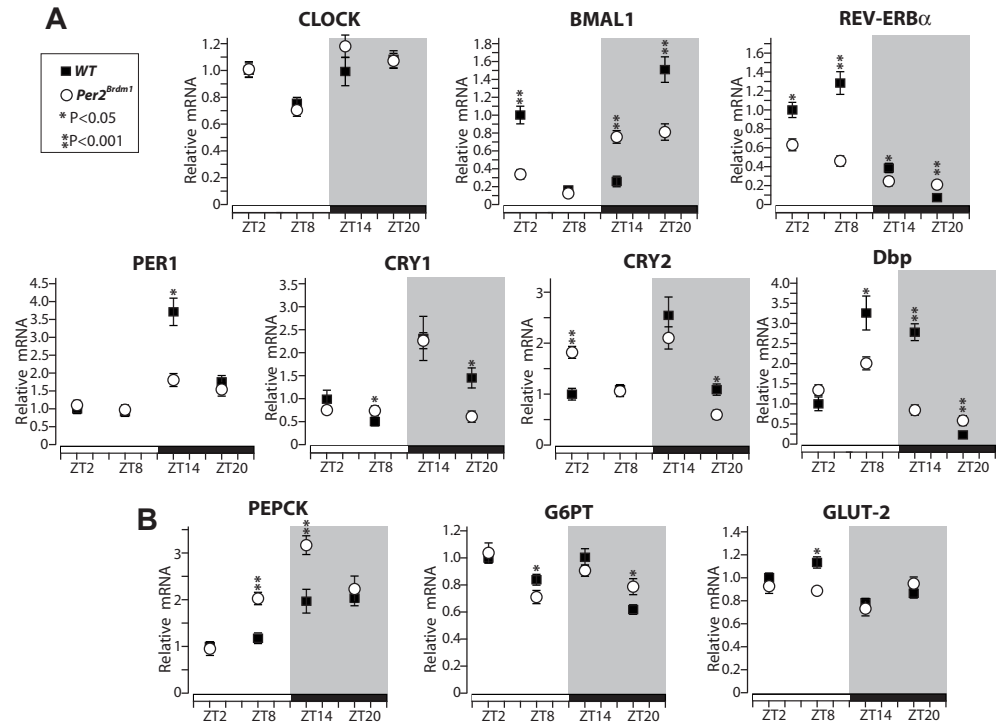

Supplemental Fig. S3

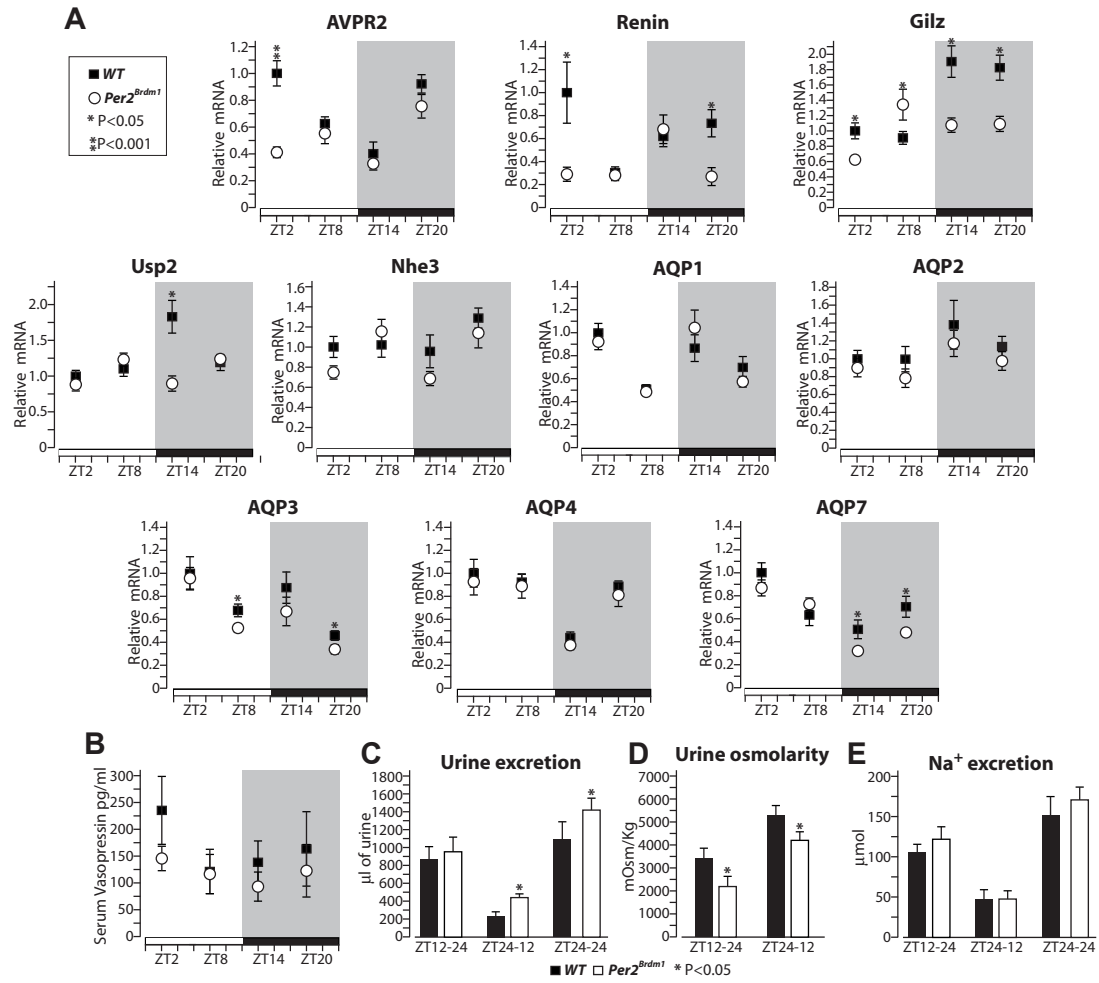

Supplemental Fig. S4

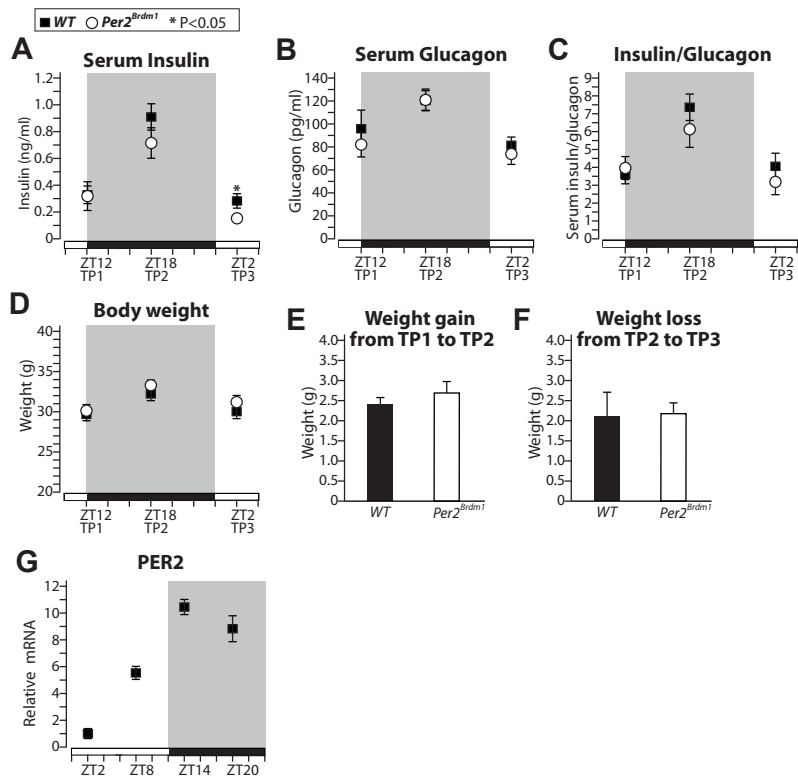

Supplemental Fig. S5

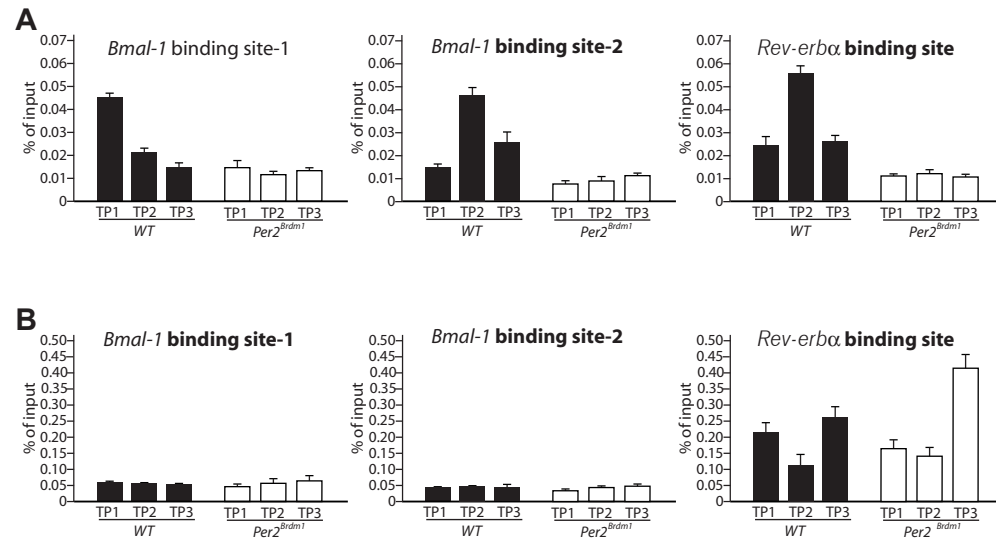

**Supplemental Table 1.** List of primers sequences used for qPCR.

| <b>Name</b>            | <b>Primer Forward</b>       | <b>Primer Reverse</b>     |
|------------------------|-----------------------------|---------------------------|
| BMAL1                  | TCAAGACGACATAGGACACCT       | GGACATTGGCTAAAACAACAGTG   |
| CLOCK                  | CTTCCTGGTAACGCGAGAAAG       | TCGAATCTCACTAGCATCTGACT   |
| CRY 1                  | CACTGGTTCGGAAAGGGACTC       | CTGAAGCAAAAATCGCCACCT     |
| CRY 2                  | CACTGGTTCGGCAAAGGACTA       | CCACGGGTTCGAGGATGTAGA     |
| REV-ERB $\alpha$       | TACATTGGCTCTAGTGGCTCC       | CAGTAGGTGATGGTGGGAAGTA    |
| PER1                   | GATGTGGGTGTCTTCTATGGC       | AGGACCTCCTCTGATTCGGC      |
| PER2                   | GAAAGCTGTCACCACCATAGAA      | AACTCGCACTTCCTTTTCAGG     |
| Dbp                    | CCTGATCCCGCTGATCTCG         | CAGGCACCTGGACTTTCTTT      |
| Glycogenin             | TGGAGTCTTTGTCTATCAACCCT     | TTGCCAGCCACTAAAATATGT     |
| Glycogen synthase      | ACCAAGGCCAAAACGACAG         | GGGCTCACATTGTTCTACTTGA    |
| Glucokinase            | TCAGCCGGATGCAGAAGGA         | GCAACATCTTTACTACTGGCCT    |
| GBE-1                  | TTCTGACGCAGCGGAGTATG        | GCCACTCGGCTTGGAATGT       |
| Glycogen phosphorylase | GAGAAGCGACGGCAGATCAG        | CTTGACCAGAGTGAAGTGCAG     |
| AGL                    | GAGAGTGACCGAGCTAGGAAC       | GCAACCAACGAACAGCAGATT     |
| PGM2                   | AGTGAAGACGCAGGCATATCC       | GGCTCCACGGTAGAGACGA       |
| GAA                    | GGGCTGCACCTTATCTC           | GAGGTCGGTACGTCTTCCAC      |
| GLUT-2                 | TCAGAAGACAAGATCACCGGA       | GCTGGTGTGACTGTAAGTGGG     |
| G6PT                   | GGCTACGGCTACTATCGCAC        | AGGAGGGCATGACAAAGGAGA     |
| PEPCK                  | CTG CAT AAC GGT CTG GAC TTC | CAG CAA CTG CCC GTA CTC C |
| PP1c                   | GAGAACGAGATCCGAGGACTC       | GAGGAAAGCCACCGTATTCAA     |
| G <sub>L</sub>         | GTGGACATCCAATACAGCTACAG     | CCGAGAACACTTTACCATTTGT    |
| PTG                    | GAAGCCAAATCGCAGAGTGAG       | CGTGAAGTTTTAAGCTGGAGGA    |
| AVPR2                  | GCTGTGGCTCTGTTTCAAGTG       | CCAGGATCATGTAGGAAGAGGC    |
| AQP1                   | AGGCTTCAATTACCACTGGA        | CTTTGGGCCAGAGTAGCGAT      |
| AQP2                   | TGGTGGGTTGCCATGTCTC         | GCGGATTTCTACAGGGGTAATCT   |
| AQP3                   | CCTTGGCATCTTGGTGGCT         | GAAGCACATTGCGAAGGTCAC     |
| AQP4                   | ATCAGCATCGCTAAGTCCGTC       | CAGGCACTGTGCAATGATGTA     |
| AQP7                   | CACTAGGCCGAATGACCTGG        | CGCCTGCAAAGTGGTTAATGG     |
| Renin                  | CCTTCCTTGACCAATCTTACCTC     | GATGCCAATCTCGCCGTAGT      |
| Nhe3                   | ATACTTCATGCCAATCGACTCT      | GTGCCAATGACAGCATATAGCA    |
| Usp2                   | CGTCGTCCCCCAATGATGTG        | GTGGCGCATATCTCTGGATCT     |
| Gilz                   | ACCACCTGATGTACGCTGTG        | TCTGCTCCTTTAGGACCTCCA     |



**Supplemental Table 2.** List of Primer used for qPCR-ChIP analysis.

| Name      | Pos./TSS | FW                               | RV                                 |
|-----------|----------|----------------------------------|------------------------------------|
| Gys2 bs1  | 1,799    | CGT GTG CCA CGT GCA<br>TCT TGT G | GGC GGA AGC CAG GAC<br>AGA GT      |
| Gys2 bs2  | 13,594   | CAG GCT GGG ACT<br>GGG CTG AT    | AAG CAG TGT GGC ATG GGT<br>TGT     |
| Gys2 bs3  | 21,379   | CGG GCC AGT GCA CTC<br>TCT CTC T | AGC ACC GTC ACC TAC CAA<br>AGA TCA |
|           |          |                                  |                                    |
| Gl bs1    | -169,285 | ATG CGG AGG CCT<br>GGT GTG TT    | GGG ACT GGG AGG AGG CTT<br>ACA     |
| Gl bs2    | 30,855   | TGC AGC TGC GCA CTG<br>GGT TA    | GCT GAC GCT GCT GAG CTG<br>ACA T   |
|           |          |                                  |                                    |
| Ptg bs1   | -216     | CTC CGG GAA CAC<br>GGC TGG AT    | CTG GAA GGC GGC CGT AGA<br>GT      |
| Ptg bs2   | 4,969    | CCA GGC TGG ACT GTC<br>CCT CG    | GCA CGA GCT CAG GTC GGT<br>CA      |
|           |          |                                  |                                    |
| Bmal1 bs1 | -1,822   | GCC AAT TCA CAT TTC<br>AAC CA    | GAC ACA AGG CAG CAT TTC<br>AA      |
| Bmal1 bs2 | -20      | CAG CGA GCC ACG<br>GTG A         | CCC GAG ACG GCT GCT                |
|           |          |                                  |                                    |
| RevErba   | 1,355    | CCC TGA CCA ACC TTG<br>AGC TA    | CAT GTC TTG CTC ACC CAC<br>TG      |
|           |          |                                  |                                    |
